# Supplementary material for: Investigating Antibody Reactivity to the Intestinal Microbiome in Severe Myalgic Encephalomyelitis/Chronic Fatigue Syndrome (ME/CFS): A Feasibility Study
Source: MDPI journal article supplement (doi:10.3390/ijms242015316), 2023-10-18
Supplement: s1 [file s1]

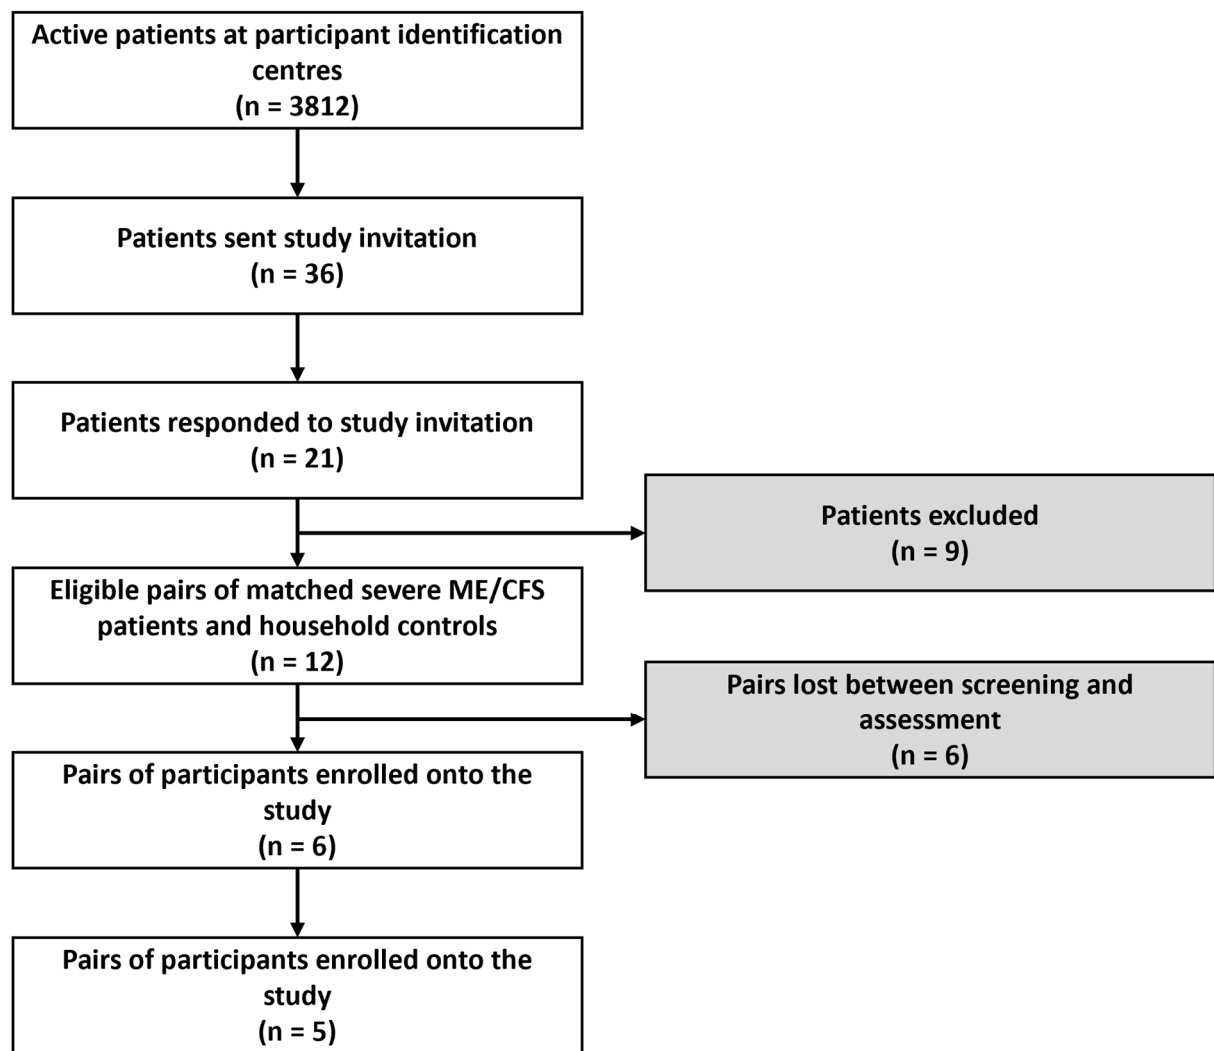

**Figure S1.** Study participant recruitment pathway. Severe ME patients were recruited from the CFS clinic at Epsom and St Helier University Hospitals (ESTH), Carshalton, UK and the ME/CFS service at East Coast Community Healthcare Centre, Lowestoft, UK.

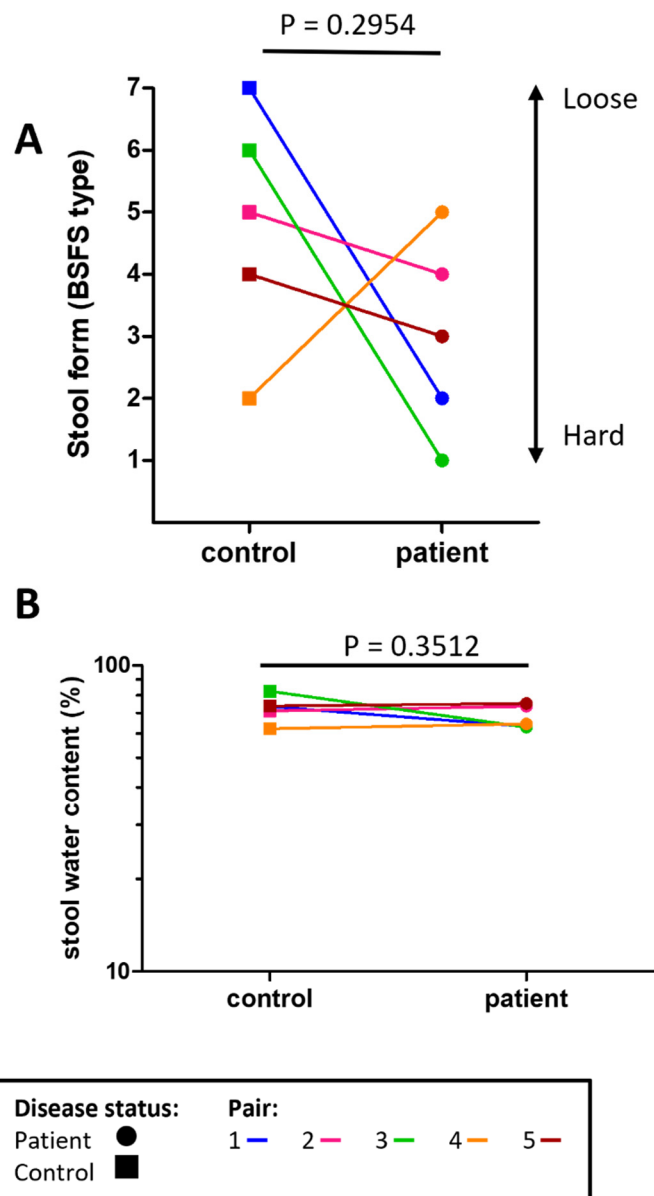

**Figure S2.** Stool consistency: **(A)** Analysis of stool consistency using the Bristol stool form scale (BSFS) in severe ME/CFS patients (n=5) and matched household controls (n=5); **(B)** Water content in stool samples in severe ME/CFS patients (n=5) and matched household controls (n=5). *P* values were calculated using a two-tailed paired *t*-test.

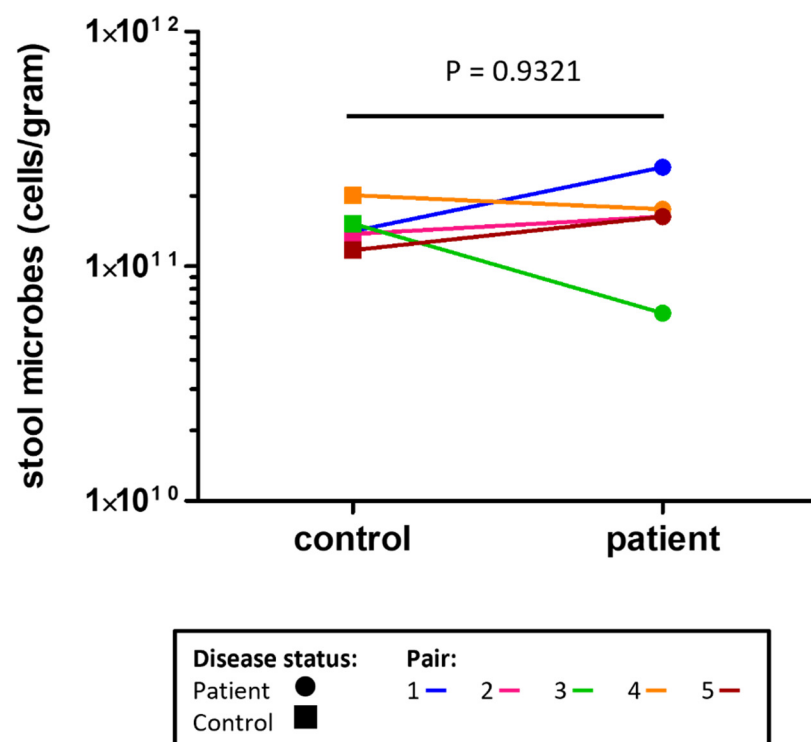

**Figure S3.** Stool microbial load. Flow cytometric analysis of SYBR Green+ microbial load in stool samples of severe ME/CFS patients (n=5) and matched household controls (n=5).

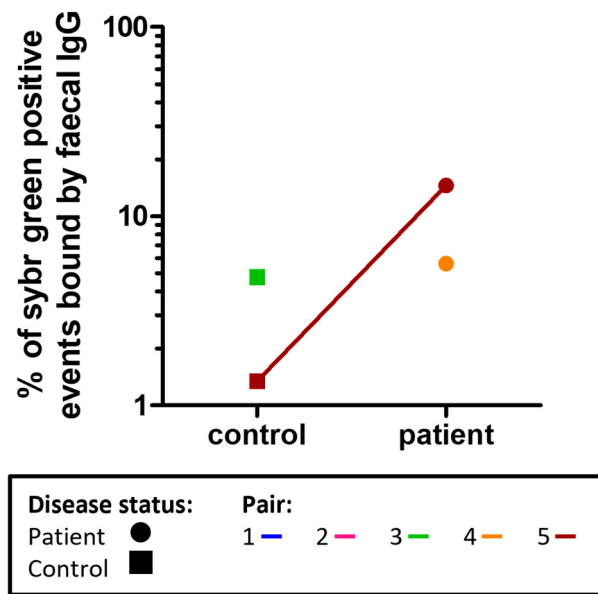

**Figure S4.** Proportion of stool microbes bound by faecal IgG. Flow cytometric analysis of SYBR Green+ IgG+ microbes in stool samples of severe ME/CFS patients (n=5) and matched household controls (n=5).

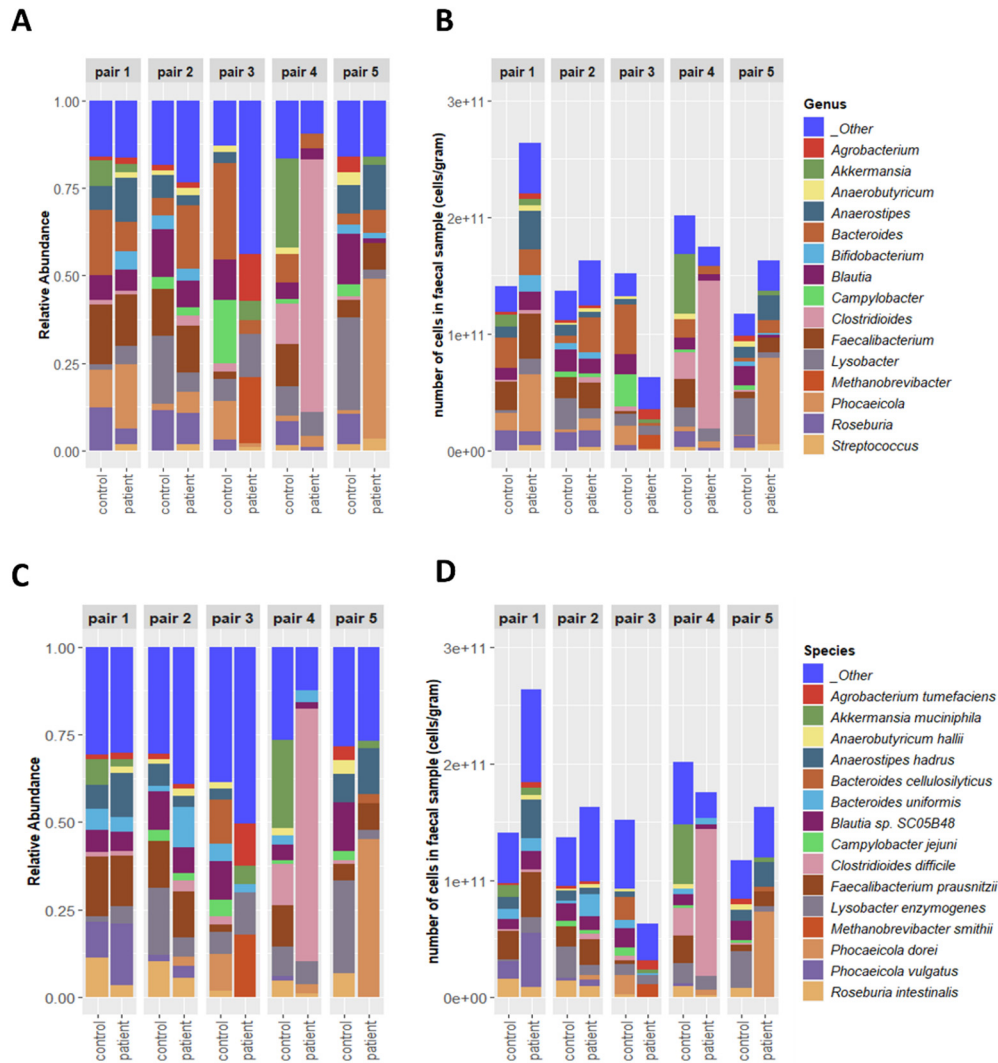

**Figure S5.** Stool microbiome profiling of severe ME/CFS patients (n=5) and matched household controls (n=5): **(A)** Relative microbiome profiling (RMP) at the genus-level; **(B)** quantitative microbiome profiling (QMP, cells per gram of faeces) at the genus-level; **(C)** RMP at the species-level, **(D)** QMP at the species-level.

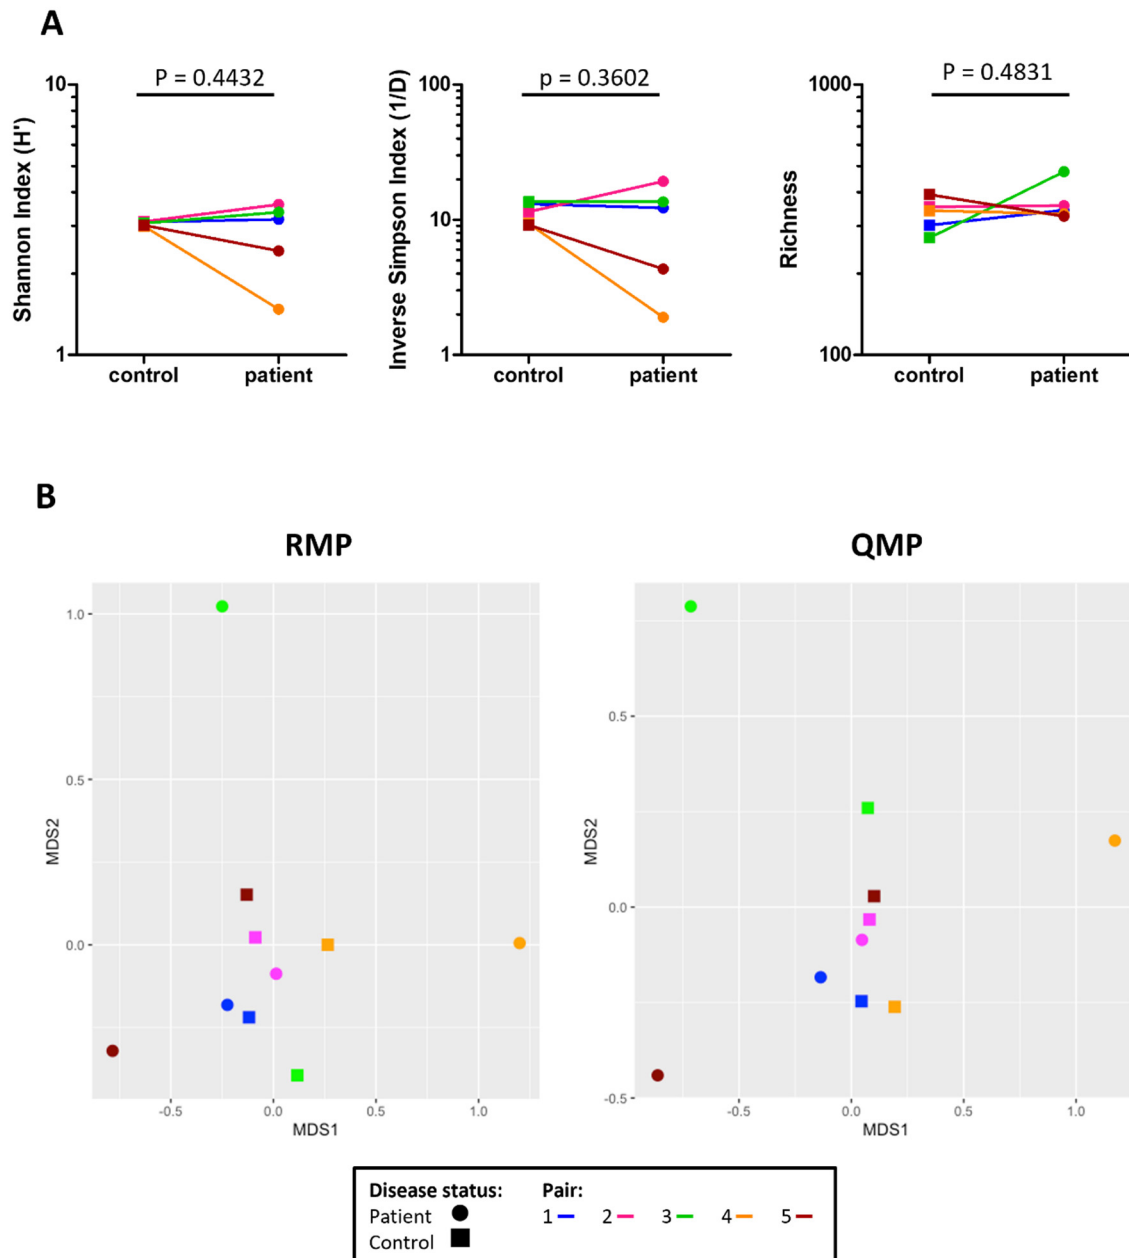

**Figure S6.** Pairwise alpha- and beta-diversity comparisons of the stool microbiomes of severe ME/CFS patients ( $n=5$ ) and matched household controls ( $n=5$ ). Analyses were performed at the species-level on shotgun metagenomics data from SYBR+ stool microbes; **(A)** Alpha diversity measures of Shannon index, inverse Simpson index and richness based on reads rarefied to the lowest sequencing depth; **(B)** Beta diversity of relative microbiome profiling (RMP) and quantitative microbiome profiling (QMP, cells per gram faeces). Beta-diversity was calculated using Bray-Curtis dissimilarity, presented on a non-metric multi-dimensional scaling (NMDS) plot.  $P$  values were measured using two-tailed paired  $t$ -tests.

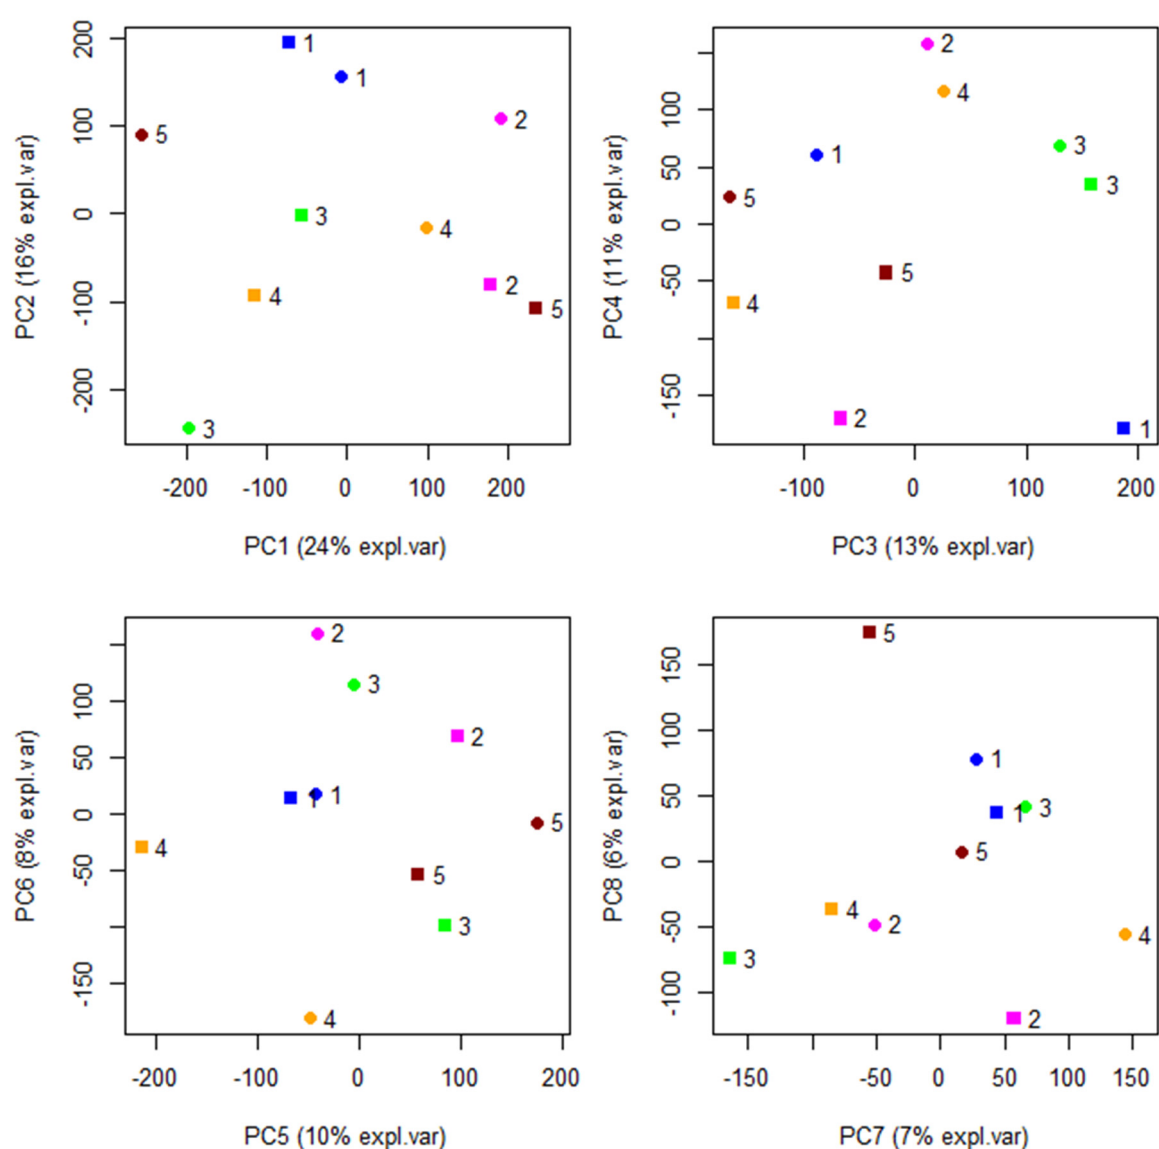

**Figure S7.** Functional composition of stool metagenomes from severe ME/CFS patients (circles) (n=5) and matched household controls (squares) (n=5). Principal component analysis (PCA) of the relative abundances of gene families. Pair numbers are depicted on the graph but were not used in analysis.

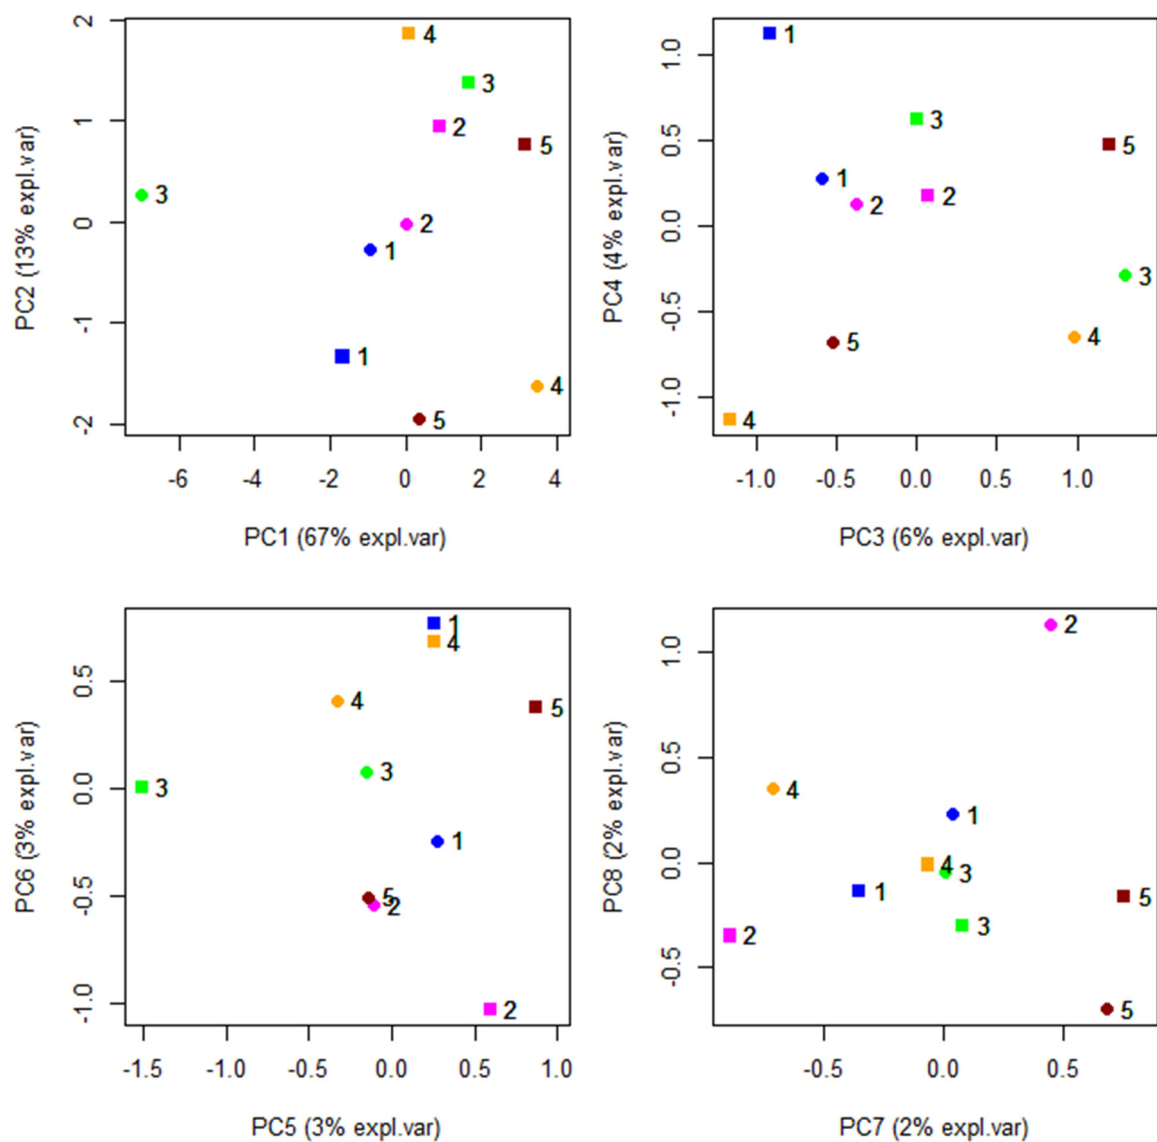

**Figure S8.** Functional profiling of stool microbes reactive with serum IgG. Principal component analysis (PCA) of IgG probability ratios of gene families from the stool microbiome in severe ME/CFS patients (circles) (n=5) and matched household controls (squares) (n=5). Pair numbers are depicted on the graphs but were not used in analysis.



**Table S1.** The size of IgG positive and IgG negative fractions collected during IgG-Seq. This data was used to calculation of IgG probability ratio scores.

| Pair | Participant | Fraction Sizes (%) |      |
|------|-------------|--------------------|------|
|      |             | IgG+               | IgG– |
| 1    | Patient     | 21.1               | 79.5 |
|      | Control     | 18.0               | 79.8 |
| 2    | Patient     | 35.1               | 58.1 |
|      | Control     | 48.1               | 49.7 |
| 3    | Patient     | 17.9               | 65.5 |
|      | Control     | 46.3               | 44.9 |
| 4    | Patient     | 65.0               | 29.0 |
|      | Control     | 33.7               | 63.1 |
| 5    | Patient     | 24.2               | 75.3 |
|      | Control     | 62.7               | 31.1 |
